# Supplementary material for: A Dynamical Phyllotaxis Model to Determine Floral Organ Number
Source: PubMed Central journal article supplement (PMC4423988; doi:10.1371/journal.pcbi.1004145), 2015-05-07
Supplement: pcbi.1004145.s001.pdf [file pcbi.1004145.s001.pdf]

# A Dynamical Phyllotaxis Model to Determine Floral Organ Number.

Miho S. Kitazawa<sup>1,2,\*</sup>, Koichi Fujimoto<sup>1,\*</sup>

**1 Department of Biological Sciences, Osaka University, Toyonaka, Osaka, Japan.**

**2 Japan Society for the Promotion of Science, Tokyo, Japan.**

\* [fujimoto@bio.sci.osaka-u.ac.jp](mailto:fujimoto@bio.sci.osaka-u.ac.jp) (KF); [kitazawa@bio.sci.osaka-u.ac.jp](mailto:kitazawa@bio.sci.osaka-u.ac.jp) (MSK)

## S1 Text

**Analytical derivation of the average radial velocity during growth.** The radial velocity of primordia averaged over the growth process is approximately derived by integrating Monte Carlo steps. The radial displacement of the primordium  $k$  in a single Monte Carlo step given by  $x = r'_k - r_k$  follows a Gaussian distribution (see Numerical experiments in the Model section) given by

$$\frac{1}{\sqrt{2\pi\sigma_r^2}} \exp\left(-\frac{x^2}{2\sigma_r^2}\right),$$

where the average and the standard deviation are zero ( $r_k = r'_k$ ) and  $\sigma_r$ , respectively. At  $P_{MP} = 0$ , when the radial gradient of the growth potential  $U_{g,k}$  is negative, the Metropolis method always selects outward movement (see Numerical experiments in the Model section) so that the actual movement follows a one-sided truncated Gaussian distribution ( $x \geq 0$ ). The average radial velocity  $V$  is approximated as the expected value given by

$$V = \int_0^\infty \frac{x}{\sqrt{2\pi\sigma_r^2}} \exp\left(-\frac{x^2}{2\sigma_r^2}\right) dx = \frac{\sigma_r}{\sqrt{2\pi}}. \quad (S1)$$

Hence, during the time interval  $\tau$  of primordia initiation, all primordia move radially a distance of  $\tau\sigma_r/\sqrt{2\pi}$  on average.
